# Supplementary material for: Platelet Reduction after Aortic Bioprosthesis Implantation: Results from the PORTRAIT Study
Source: MDPI journal article supplement (doi:10.3390/jcm12237414), 2023-11-29
Supplement: s1 [file s1]

## **Supplemental Material**

### **Platelet Reduction after Aortic Bioprosthesis Implantation:**

#### **Results from the PORTRAIT Study**

##### **Supplemental Figures**

**Figure S1. Love plot reporting balancing among the three groups before (green triangles) and after (red circles) the weighting..... page 2**

##### **Supplemental Tables**

**Supplemental Table S1. Surgical details of the stented, rapid deployment, and stentless bioprostheses groups. ....page 4**

##### **Tables adjusted by overlap weighting**

**Supplemental Table S2. Post-operative platelet count of the stented, rapid deployment, and stentless bioprostheses groups, adjusted by overlap weighting.....page 6**

**Supplemental Table S3. Surgical details of the stented, rapid deployment, and stentless bioprostheses groups, adjusted by overlap weighting.....page 7**

**Supplemental Table S4. Post-operative platelet count of the stented, rapid deployment, and stentless bioprostheses groups, adjusted by overlap weighting.....page 8**

**Supplemental Table S5. Post-operative details of the stented, rapid deployment, and stentless bioprostheses groups, adjusted by overlap weighting .....page 9**

##### **Statistical Analysis**

**Multivariate analysis in all patients.....page 10**

**Multivariate analysis in stented patients.....page 14**

**Multivariate analysis in rapid deployment patients.....page 18**

**Multivariate analysis in stentless patients.....page 21**

**Figure S1.** Love plot reporting balancing among the three groups before (green triangles) and after (red circles) the weighting.

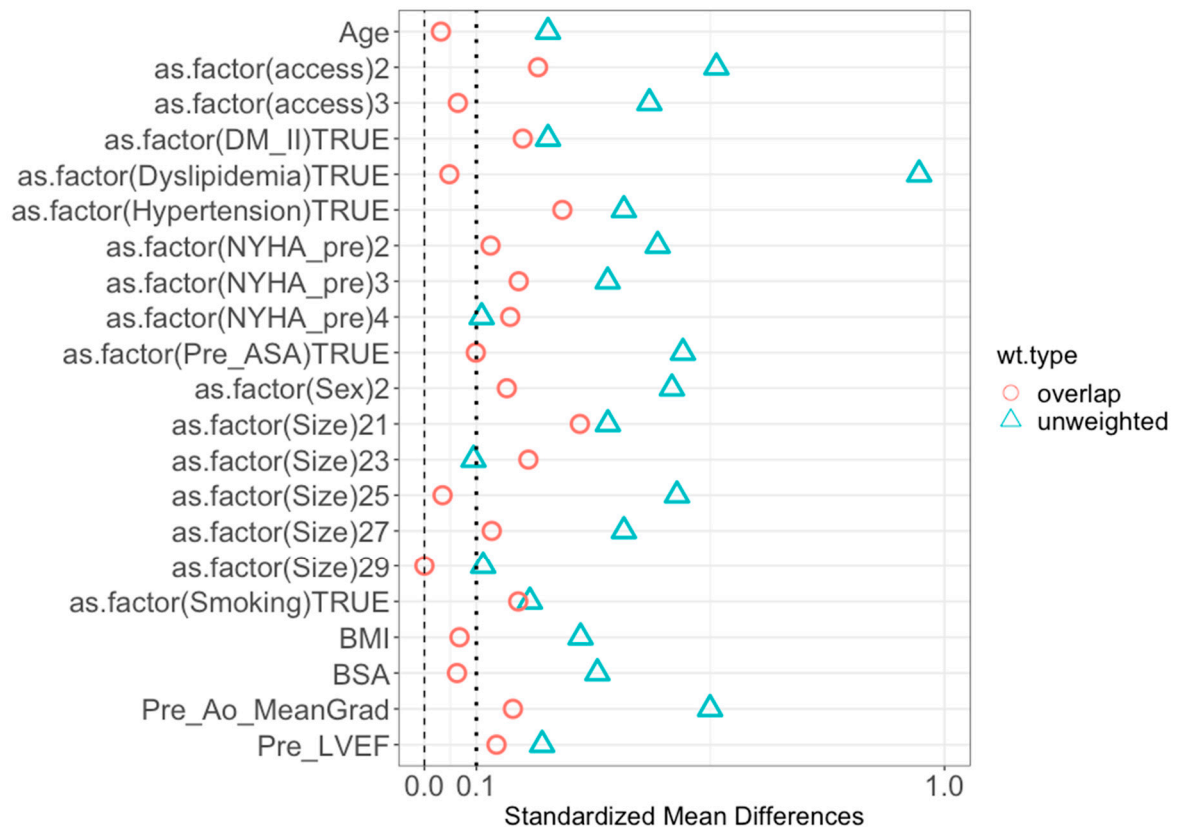

## Tables

**Supplemental Table S1. Surgical details of the stented, rapid deployment, and stentless**

**bioprostheses groups.**

|                               | Stented<br>bioprostheses (n=944) | Rapid<br>deployment<br>bioprostheses (n=218) | Stentless<br>bioprostheses (n=71) | Overall<br>p value | P value<br>(Stented vs.<br>RDV) | P value<br>(RDV vs<br>Stentless) | P value<br>(Stented vs<br>Stentless) |
|-------------------------------|----------------------------------|----------------------------------------------|-----------------------------------|--------------------|---------------------------------|----------------------------------|--------------------------------------|
| <i>Access</i>                 |                                  |                                              |                                   | < 0.001            | < 0.001                         | < 0.001                          | 0.010                                |
| <i>Full sternotomy (%)</i>    | 589 (62.4%)                      | 100 (45.9%)                                  | 57 (80.3%)                        |                    |                                 |                                  |                                      |
| <i>Mini sternotomy (%)</i>    | 340 (36.0%)                      | 96 (44.0%)                                   | 13 (18.3%)                        |                    |                                 |                                  |                                      |
| <i>Right thoracotomy (%)</i>  | 15 (1.6%)                        | 22 (10.1%)                                   | 1 (1.4%)                          |                    |                                 |                                  |                                      |
| <i>Prosthesis size</i>        |                                  |                                              |                                   | < 0.001            | < 0.001                         | 0.012                            | <0.001                               |
| <i>19mm</i>                   | 98 (10.4)                        | 7 (3.2)                                      | 5 (7.0)                           |                    |                                 |                                  |                                      |
| <i>21mm</i>                   | 294 (31.1)                       | 35 (16.1)                                    | 19 (26.8)                         |                    |                                 |                                  |                                      |
| <i>23mm</i>                   | 351 (37.2)                       | 76 (34.9)                                    | 28 (39.4)                         |                    |                                 |                                  |                                      |
| <i>25mm</i>                   | 179 (19.0)                       | 74 (33.9)                                    | 10 (14.1)                         |                    |                                 |                                  |                                      |
| <i>27mm</i>                   | 18 (1.9)                         | 26 (11.9)                                    | 9 (12.7)                          |                    |                                 |                                  |                                      |
| <i>29mm</i>                   | 4 (0.4)                          | 0 (0)                                        | 0 (0)                             |                    |                                 |                                  |                                      |
| <i>CPB time (min)</i>         | 99.5±30.1                        | 76.4±25.4                                    | 106.5±28.8                        | < 0.001            | < 0.001                         | <0.001                           | 0.133                                |
| <i>Cross-clamp time (min)</i> | 22.3±7.61                        | 48.9±18.7                                    | 85.6±24.0                         | < 0.001            | < 0.001                         | < 0.001                          | < 0.001                              |

**Abbreviations:** RDV, rapid deployment valve; CPB, cardiopulmonary bypass.

Tables adjusted by overlap weighting

**Supplemental Table S2. Post-operative platelet count of the stented, rapid deployment, and stentless bioprostheses groups, adjusted by overlap weighting.**

|                                                                       | Stented<br>bioprostheses<br>(n=944) | Rapid<br>deployment<br>bioprostheses<br>(n=218) | Stentless<br>bioprostheses<br>(n=71) | Overall<br>p value | P value<br>(Stented<br>vs.<br>RDV) | P value<br>(RDV vs<br>Stentless) | P value<br>(Stented<br>vs<br>Stentless) |
|-----------------------------------------------------------------------|-------------------------------------|-------------------------------------------------|--------------------------------------|--------------------|------------------------------------|----------------------------------|-----------------------------------------|
| <i>Pre-operatively<br/>PC</i>                                         | 218±65                              | 219±62                                          | 216±53                               | 0.910              | 0.792                              | 0.666                            | 0.867                                   |
| <i>Day 0 PC</i>                                                       | 167±62                              | 142±52                                          | 126±47                               | < 0.001            | < 0.001                            | < 0.001                          | < 0.001                                 |
| <i>Day 1 PC</i>                                                       | 161±55                              | 137±50                                          | 120±38                               | < 0.001            | < 0.001                            | < 0.001                          | < 0.001                                 |
| <i>Day 2 PC</i>                                                       | 169±64                              | 99±42                                           | 106±41                               | < 0.001            | < 0.001                            | 0.189                            | < 0.001                                 |
| <i>Day 3 PC</i>                                                       | 159±72                              | 96±43                                           | 97±40                                | < 0.001            | < 0.001                            | 0.994                            | < 0.001                                 |
| <i>Day 4 PC</i>                                                       | 189±77                              | 106±52                                          | 94±45                                | < 0.001            | < 0.001                            | 0.064                            | < 0.001                                 |
| <i>Day 5 PC</i>                                                       | 210±80                              | 100±53                                          | 100±43                               | < 0.001            | < 0.001                            | 0.999                            | < 0.001                                 |
| <i>PC at discharge</i>                                                | 215±82                              | 164±93                                          | 126±42                               | < 0.001            | < 0.001                            | < 0.001                          | < 0.001                                 |
| <i>Number of<br/>patients with PC<br/>&lt;100.000/uL on<br/>Day 2</i> | 166 (18%)                           | 118 (54%)                                       | 31 (44%)                             | < 0.001            | < 0.001                            | 0.464                            | < 0.001                                 |
| <i>Number of<br/>patients with PC<br/>&lt;100.000/uL on<br/>Day 3</i> | 136 (14%)                           | 108 (50%)                                       | 39 (55%)                             | < 0.001            | < 0.001                            | 0.127                            | < 0.001                                 |

**Abbreviations:** RDV, rapid deployment valve; PC, platelet count

**Supplemental Table S3. Surgical details of the stented, rapid deployment, and stentless bioprostheses groups, adjusted by overlap weighting.**

|                               | Stented<br>bioprostheses (n=944) | Rapid<br>deployment<br>bioprostheses (n=218) | Stentless<br>bioprostheses (n=71) | Overall<br>I p<br>value | P value<br>(Stented<br>vs.<br>RDV) | P value<br>(RDV vs<br>Stentless<br>) | P value<br>(Stented<br>vs<br>Stentless<br>) |
|-------------------------------|----------------------------------|----------------------------------------------|-----------------------------------|-------------------------|------------------------------------|--------------------------------------|---------------------------------------------|
| <i>Access</i>                 |                                  |                                              |                                   | < 0.001                 | < 0.001                            | < 0.001                              | 0.020                                       |
| <i>Full sternotomy (%)</i>    | 589 (62.4%)                      | 100 (45.9%)                                  | 57 (80.3%)                        |                         |                                    |                                      |                                             |
| <i>Mini sternotomy (%)</i>    | 340 (36.0%)                      | 96 (44.0%)                                   | 13 (18.3%)                        |                         |                                    |                                      |                                             |
| <i>Right thoracotomy (%)</i>  | 15 (1.6%)                        | 22 (10.1%)                                   | 1 (1.4%)                          |                         |                                    |                                      |                                             |
| <i>Prosthesis size</i>        |                                  |                                              |                                   | < 0.001                 | < 0.001                            | 0.012                                | <0.001                                      |
| <i>19mm</i>                   | 98 (10.4)                        | 7 (3.2)                                      | 5 (7.0)                           |                         |                                    |                                      |                                             |
| <i>21mm</i>                   | 294 (31.1)                       | 35 (16.1)                                    | 19 (26.8)                         |                         |                                    |                                      |                                             |
| <i>23mm</i>                   | 351 (37.2)                       | 76 (34.9)                                    | 28 (39.4)                         |                         |                                    |                                      |                                             |
| <i>25mm</i>                   | 179 (19.0)                       | 74 (33.9)                                    | 10 (14.1)                         |                         |                                    |                                      |                                             |
| <i>27mm</i>                   | 18 (1.9)                         | 26 (11.9)                                    | 9 (12.7)                          |                         |                                    |                                      |                                             |
| <i>29mm</i>                   | 4 (0.4)                          | 0 (0)                                        | 0 (0)                             |                         |                                    |                                      |                                             |
| <i>CPB time (min)</i>         | 99.5±30.1                        | 76.4±25.4                                    | 106.5±28.8                        | < 0.001                 | < 0.001                            | <0.001                               | 0.167                                       |
| <i>Cross-clamp time (min)</i> | 7.61±22.3                        | 48.9±18.7                                    | 85.6±24.0                         | < 0.001                 | < 0.001                            | < 0.001                              | < 0.001                                     |

**Abbreviations:** RDV, rapid deployment valve; CPB, cardiopulmonary bypass.

**Supplemental Table S4. Post-operative platelet count of the stented, rapid deployment, and stentless bioprostheses groups, adjusted by overlap weighting.**

|                                                                       | Stented<br>bioprostheses<br>(n=944) | Rapid<br>deployment<br>bioprostheses<br>(n=218) | Stentless<br>bioprostheses<br>(n=71) | Overall<br>p value | P value<br>(Stented<br>vs.<br>RDV) | P value<br>(RDV vs<br>Stentless) | P value<br>(Stented<br>vs<br>Stentless) |
|-----------------------------------------------------------------------|-------------------------------------|-------------------------------------------------|--------------------------------------|--------------------|------------------------------------|----------------------------------|-----------------------------------------|
| <i>Pre-operatively<br/>PC</i>                                         | 218±65                              | 219±62                                          | 216±53                               | 0.910              | 0.792                              | 0.666                            | 0.867                                   |
| <i>Day 0 PC</i>                                                       | 167±62                              | 142±52                                          | 126±47                               | < 0.001            | < 0.001                            | < 0.001                          | < 0.001                                 |
| <i>Day 1 PC</i>                                                       | 161±55                              | 137±50                                          | 120±38                               | < 0.001            | < 0.001                            | < 0.001                          | < 0.001                                 |
| <i>Day 2 PC</i>                                                       | 159±64                              | 99±42                                           | 106±41                               | < 0.001            | < 0.001                            | 0.189                            | < 0.001                                 |
| <i>Day 3 PC</i>                                                       | 169±72                              | 96±43                                           | 97±40                                | < 0.001            | < 0.001                            | 0.994                            | < 0.001                                 |
| <i>Day 4 PC</i>                                                       | 189±77                              | 106±52                                          | 94±45                                | < 0.001            | < 0.001                            | 0.064                            | < 0.001                                 |
| <i>Day 5 PC</i>                                                       | 210±80                              | 100±53                                          | 100±43                               | < 0.001            | < 0.001                            | 0.999                            | < 0.001                                 |
| <i>PC at discharge</i>                                                | 219±82                              | 164±93                                          | 126±42                               | < 0.001            | < 0.001                            | < 0.001                          | < 0.001                                 |
| <i>Number of<br/>patients with PC<br/>&lt;100.000/uL on<br/>Day 2</i> | 166 (18%)                           | 118 (54%)                                       | 31 (44%)                             | < 0.001            | < 0.001                            | 0.464                            | < 0.001                                 |
| <i>Number of<br/>patients with PC<br/>&lt;100.000/uL on<br/>Day 3</i> | 136 (14%)                           | 108 (50%)                                       | 39 (55%)                             | < 0.001            | < 0.001                            | 0.127                            | < 0.001                                 |

**Abbreviations:** RDV, rapid deployment valve; PC, platelet count.

**Supplemental Table S5. Post-operative details of the stented, rapid deployment, and stentless bioprostheses groups, , adjusted by overlap weighting**

|                                       | <b>Stented<br/>bioprostheses<br/>(n=944)</b> | <b>Rapid<br/>deployment<br/>bioprostheses<br/>(n=218)</b> | <b>Stentless<br/>bioprostheses<br/>(n=71)</b> | <b>Overall<br/>p value</b> | <b>P value<br/>(Stented<br/>vs.<br/>RDV)</b> | <b>P value<br/>(RDV vs<br/>Stentless)</b> | <b>P value<br/>(Stented<br/>vs<br/>Stentless)</b> |
|---------------------------------------|----------------------------------------------|-----------------------------------------------------------|-----------------------------------------------|----------------------------|----------------------------------------------|-------------------------------------------|---------------------------------------------------|
| <i>Drainage blood loss (ml)</i>       | 583±534                                      | 761±471                                                   | 584±238                                       | <0.001                     | <0.001                                       | <0.001                                    | 0.999                                             |
| <i>RBC transfused</i>                 | 0.79±1.29                                    | 1.98±2.50                                                 | 1.29±1.34                                     | < 0.001                    | < 0.001                                      | <0.001                                    | 0.002                                             |
| <i>FFP transfused</i>                 | 0.39±1.26                                    | 0.91±2.06                                                 | 1.12±1.51                                     | < 0.001                    | < 0.001                                      | 0.085                                     | <0.001                                            |
| <i>PLT transfused</i>                 | 0.09±0.69                                    | 0.20±0.60                                                 | 0±0                                           | <0.001                     | 0.036                                        | <0.001                                    | 0.108                                             |
| <i>Bleeding</i>                       | 76 (8.1%)                                    | 18 (8.3%)                                                 | 5 (7.2%)                                      | 0.442                      | 0.314                                        | 0.206                                     | 0.661                                             |
| <i>Reoperation for bleeding</i>       | 46 (4.9%)                                    | 16 (7.3%)                                                 | 3 (4.2%)                                      | 0.313                      | 0.149                                        | 0.349                                     | 0.800                                             |
| <i>Ischemic stroke</i>                | 16 (1.7%)                                    | 5 (2.3%)                                                  | 0 (0%)                                        | 0.949                      | 0.746                                        | 0.997                                     | 0.997                                             |
| <i>TIA</i>                            | 10 (1%)                                      | 0 (0%)                                                    | 0 (0%)                                        | 1.000                      | 0.993                                        | 1.000                                     | 0.996                                             |
| <i>Intracranial bleeding</i>          | 4 (0.4%)                                     | 0 (0%)                                                    | 0 (0%)                                        | 1.000                      | 0.995                                        | 1.000                                     | 0.997                                             |
| <i>Gastrointestinal bleeding</i>      | 5 (0.5%)                                     | 3 (1.3%)                                                  | 0 (0%)                                        | 0.965                      | 0.789                                        | 0.997                                     | 0.997                                             |
| <i>ICU length of stay (days)</i>      | 2 (0-81)                                     | 2 (1-90)                                                  | 3 (0-21)                                      | *                          | *                                            | *                                         | *                                                 |
| <i>Hospital length of stay (days)</i> | 9 (0-81)                                     | 9 (0-114)                                                 | 11 (6-24)                                     | *                          | *                                            | *                                         | *                                                 |
| <i>In-hospital mortality</i>          | 22 (2.3%)                                    | 13 (6.0%)                                                 | 1 (1.4%)                                      | 0.006                      | 0.003                                        | 0.120                                     | 0.659                                             |

## Multivariate Analysis - Overall patients

### Drainage blood loss

#### Coefficients

| Model          |             | Unstandardized | Standard Error | Standardized | t      | p      | 95% CI     |           |
|----------------|-------------|----------------|----------------|--------------|--------|--------|------------|-----------|
|                |             |                |                |              |        |        | Lower      | Upper     |
| H <sub>0</sub> | (Intercept) | 606.450        | 16.081         |              | 37.713 | < .001 | 574.896    | 638.005   |
| H <sub>1</sub> | (Intercept) | 2339.578       | 5590.947       |              | 0.418  | 0.676  | -8631.394  | 13310.550 |
|                | P1          | 0.540          | 3.586          | 0.044        | 0.150  | 0.880  | -6.498     | 7.577     |
|                | grad1       | -152.716       | 481.739        | -2.274       | -0.317 | 0.751  | -1098.020  | 792.588   |
|                | tmin        | -1774.388      | 5600.052       | -2.274       | -0.317 | 0.751  | -12763.226 | 9214.449  |
|                | Pmin        | -0.610         | 3.615          | -0.055       | -0.169 | 0.866  | -7.703     | 6.484     |

### Bleeding events

#### Coefficients

|             | Estimate | Standard Error | Odds Ratio | z      | Wald Test      |    |       | 95% Confidence interval |             |
|-------------|----------|----------------|------------|--------|----------------|----|-------|-------------------------|-------------|
|             |          |                |            |        | Wald Statistic | df | p     | Lower bound             | Upper bound |
| (Intercept) | 5.994    | 36.449         | 400.877    | 0.164  | 0.027          | 1  | 0.869 | -65.445                 | 77.432      |
| P1          | 0.019    | 0.022          | 1.019      | 0.854  | 0.730          | 1  | 0.393 | -0.025                  | 0.063       |
| grad1       | -0.543   | 3.147          | 0.581      | -0.173 | 0.030          | 1  | 0.863 | -6.710                  | 5.625       |
| tmin        | -6.999   | 36.556         | 9.131e-4   | -0.191 | 0.037          | 1  | 0.848 | -78.648                 | 64.650      |
| Pmin        | -0.023   | 0.023          | 0.978      | -1.003 | 1.005          | 1  | 0.316 | -0.067                  | 0.022       |

*Note.* Bleeding level '1' coded as class 1.



## Re-operation for bleeding

### Coefficients

|             | Estimate | Standard Error | Odds Ratio | z      | Wald Test      |    |       | 95% Confidence interval |             |
|-------------|----------|----------------|------------|--------|----------------|----|-------|-------------------------|-------------|
|             |          |                |            |        | Wald Statistic | df | p     | Lower bound             | Upper bound |
| (Intercept) | 10.778   | 44.444         | 47939.131  | 0.242  | 0.059          | 1  | 0.808 | -76.331                 | 97.887      |
| P1          | 0.014    | 0.027          | 1.015      | 0.534  | 0.285          | 1  | 0.593 | -0.039                  | 0.068       |
| grad1       | -0.968   | 3.836          | 0.380      | -0.252 | 0.064          | 1  | 0.801 | -8.487                  | 6.552       |
| tmin        | -11.885  | 44.572         | 6.892e -6  | -0.267 | 0.071          | 1  | 0.790 | -99.246                 | 75.475      |
| Pmin        | -0.019   | 0.027          | 0.981      | -0.698 | 0.487          | 1  | 0.485 | -0.073                  | 0.035       |

Note. Reop\_bleeding level '1' coded as class 1.

## Ischemic stroke

### Coefficients

|             | Estimate | Standard Error | Odds Ratio | z      | Wald Test      |    |       | 95% Confidence interval |             |
|-------------|----------|----------------|------------|--------|----------------|----|-------|-------------------------|-------------|
|             |          |                |            |        | Wald Statistic | df | p     | Lower bound             | Upper bound |
| (Intercept) | 182.508  | 82.408         | 1.829e +79 | 2.215  | 4.905          | 1  | 0.027 | 20.991                  | 344.026     |
| P1          | 0.062    | 0.028          | 1.064      | 2.230  | 4.971          | 1  | 0.026 | 0.007                   | 0.116       |
| grad1       | -15.490  | 7.115          | 1.875e -7  | -2.177 | 4.739          | 1  | 0.029 | -29.436                 | -1.544      |
| tmin        | -182.709 | 82.735         | 4.471e -80 | -2.208 | 4.877          | 1  | 0.027 | -344.868                | -20.551     |
| Pmin        | -0.061   | 0.029          | 0.941      | -2.134 | 4.554          | 1  | 0.033 | -0.117                  | -0.005      |

Note. Stroke level '1' coded as class 1.

## TIA

### Coefficients

|             | Estimate | Standard Error | Odds Ratio | z      | Wald Test      |    |       | 95% Confidence interval |             |
|-------------|----------|----------------|------------|--------|----------------|----|-------|-------------------------|-------------|
|             |          |                |            |        | Wald Statistic | df | p     | Lower bound             | Upper bound |
| (Intercept) | 111.730  | 116.997        | 3.340e +48 | 0.955  | 0.912          | 1  | 0.340 | -117.579                | 341.039     |
| P1          | -0.288   | 0.222          | 0.750      | -1.296 | 1.680          | 1  | 0.195 | -0.724                  | 0.148       |
| grad1       | -12.585  | 10.041         | 3.422e -6  | -1.253 | 1.571          | 1  | 0.210 | -32.265                 | 7.095       |
| tmin        | -136.115 | 116.583        | 7.693e -60 | -1.168 | 1.363          | 1  | 0.243 | -364.613                | 92.384      |
| Pmin        | 0.314    | 0.223          | 1.369      | 1.405  | 1.973          | 1  | 0.160 | -0.124                  | 0.752       |

*Note.* TIA level '1' coded as class 1.

## Intracranial bleeding

### Coefficients

|             | Estimate | Standard Error | Odds Ratio  | z      | Wald Test      |    |       | 95% Confidence interval |             |
|-------------|----------|----------------|-------------|--------|----------------|----|-------|-------------------------|-------------|
|             |          |                |             |        | Wald Statistic | df | p     | Lower bound             | Upper bound |
| (Intercept) | -285.314 | 269.397        | 1.230e -124 | -1.059 | 1.122          | 1  | 0.290 | -813.323                | 242.696     |
| P1          | -6.555   | 4.357          | 0.001       | -1.505 | 2.264          | 1  | 0.132 | -15.094                 | 1.983       |
| grad1       | -18.794  | 20.360         | 6.884e -9   | -0.923 | 0.852          | 1  | 0.356 | -58.698                 | 21.110      |
| tmin        | -9.350   | 189.162        | 8.693e -5   | -0.049 | 0.002          | 1  | 0.961 | -380.101                | 361.401     |
| Pmin        | 6.584    | 4.361          | 723.320     | 1.510  | 2.279          | 1  | 0.131 | -1.963                  | 15.131      |

*Note.* Intra\_cranial\_haemorrhage level '1' coded as class 1.

## Gastrointestinal bleeding

### Coefficients

|             | Estimate | Standard Error | Odds Ratio | z                      | Wald Test      |    |       | 95% Confidence interval |             |
|-------------|----------|----------------|------------|------------------------|----------------|----|-------|-------------------------|-------------|
|             |          |                |            |                        | Wald Statistic | df | p     | Lower bound             | Upper bound |
| (Intercept) | -64.635  | 137.536        | 8.498e -29 | $-\frac{0.470}{0.470}$ | 0.221          | 1  | 0.638 | -334.201                | 204.931     |
| P1          | 0.014    | 0.092          | 1.014      | 0.146                  | 0.021          | 1  | 0.884 | -0.167                  | 0.194       |
| grad1       | 4.757    | 11.950         | 116.347    | 0.398                  | 0.158          | 1  | 0.691 | -18.665                 | 28.178      |
| tmin        | 56.002   | 138.412        | 2.096e +24 | 0.405                  | 0.164          | 1  | 0.686 | -215.280                | 327.284     |
| Pmin        | -0.016   | 0.096          | 0.984      | $-\frac{0.167}{0.167}$ | 0.028          | 1  | 0.868 | -0.204                  | 0.172       |

Note. GI\_bleeding level '1' coded as class 1.

## In-hospital mortality

### Coefficients

|             | Estimate | Standard Error | Odds Ratio | z                      | Wald Test      |    |       | 95% Confidence interval |             |
|-------------|----------|----------------|------------|------------------------|----------------|----|-------|-------------------------|-------------|
|             |          |                |            |                        | Wald Statistic | df | p     | Lower bound             | Upper bound |
| (Intercept) | -41.387  | 60.820         | 1.061e -18 | $-\frac{0.680}{0.680}$ | 0.463          | 1  | 0.496 | -160.592                | 77.817      |
| P1          | 0.049    | 0.033          | 1.050      | 1.478                  | 2.183          | 1  | 0.140 | -0.016                  | 0.113       |
| grad1       | 3.439    | 5.263          | 31.151     | 0.653                  | 0.427          | 1  | 0.514 | -6.877                  | 13.754      |
| tmin        | 38.732   | 61.080         | 6.622e +16 | 0.634                  | 0.402          | 1  | 0.526 | -80.982                 | 158.446     |
| Pmin        | -0.050   | 0.034          | 0.951      | $-\frac{1.463}{1.463}$ | 2.140          | 1  | 0.144 | -0.117                  | 0.017       |

Note. In\_hospital\_mortality level '1' coded as class 1.

## Multivariate Analysis - Stented bioprostheses

### Drainage blood loss

#### Coefficients

| Model          |             | Unstandardized | Standard Error | Standardized | t      | p      | 95% CI    |           |
|----------------|-------------|----------------|----------------|--------------|--------|--------|-----------|-----------|
|                |             |                |                |              |        |        | Lower     | Upper     |
| H <sub>0</sub> | (Intercept) | 578.705        | 18.697         |              | 30.952 | < .001 | 542.005   | 615.405   |
| H <sub>1</sub> | (Intercept) | 933.986        | 6489.064       |              | 0.144  | 0.886  | 11803.354 | 13671.327 |
|                | P1          | 2.642          | 4.817          | 0.208        | 0.548  | 0.584  | -6.814    | 12.097    |
|                | grad1       | -22.692        | 558.670        | -0.289       | -0.041 | 0.968  | -1119.301 | 1073.918  |
|                | tmin        | -338.361       | 6496.499       | -0.371       | -0.052 | 0.958  | 13090.296 | 12413.573 |
|                | Pmin        | -2.271         | 4.876          | -0.180       | -0.466 | 0.641  | -11.842   | 7.300     |

### Bleeding events

#### Coefficients

|             | Estimate | Standard Error | Odds Ratio | z      | Wald Test      |    |       | 95% Confidence interval |             |
|-------------|----------|----------------|------------|--------|----------------|----|-------|-------------------------|-------------|
|             |          |                |            |        | Wald Statistic | df | p     | Lower bound             | Upper bound |
| (Intercept) | -5.928   | 41.700         | 0.003      | -0.142 | 0.020          | 1  | 0.887 | -87.659                 | 75.804      |
| P1          | 0.054    | 0.025          | 1.055      | 2.198  | 4.830          | 1  | 0.028 | 0.006                   | 0.102       |
| grad1       | 0.684    | 3.600          | 1.981      | 0.190  | 0.036          | 1  | 0.849 | -6.372                  | 7.739       |
| tmin        | 6.192    | 41.834         | 488.812    | 0.148  | 0.022          | 1  | 0.882 | -75.800                 | 88.184      |
| Pmin        | -0.057   | 0.025          | 0.944      | -2.288 | 5.233          | 1  | 0.022 | -0.107                  | -0.008      |

Note. Bleeding level '1' coded as class 1.

## Re-operation for bleeding

### Coefficients

|             | Estimate | Standard Error | Odds Ratio | z      | Wald Test      |    |       | 95% Confidence interval |             |
|-------------|----------|----------------|------------|--------|----------------|----|-------|-------------------------|-------------|
|             |          |                |            |        | Wald Statistic | df | p     | Lower bound             | Upper bound |
| (Intercept) | 12.590   | 52.183         | 293658.331 | 0.241  | 0.058          | 1  | 0.809 | -89.687                 | 114.868     |
| P1          | 0.034    | 0.030          | 1.035      | 1.155  | 1.334          | 1  | 0.248 | -0.024                  | 0.092       |
| grad1       | -1.096   | 4.505          | 0.334      | -0.243 | 0.059          | 1  | 0.808 | -9.925                  | 7.733       |
| tmin        | -13.964  | 52.348         | 8.617e -7  | -0.267 | 0.071          | 1  | 0.790 | -116.564                | 88.636      |
| Pmin        | -0.033   | 0.030          | 0.968      | -1.097 | 1.203          | 1  | 0.273 | -0.092                  | 0.026       |

Note. Reop\_bleeding level '1' coded as class 1.

## Ischaemic stroke

### Coefficients

|             | Estimate | Standard Error | Odds Ratio  | z      | Wald Test      |    |       | 95% Confidence interval |             |
|-------------|----------|----------------|-------------|--------|----------------|----|-------|-------------------------|-------------|
|             |          |                |             |        | Wald Statistic | df | p     | Lower bound             | Upper bound |
| (Intercept) | 261.435  | 101.969        | 3.467e +113 | 2.564  | 6.573          | 1  | 0.010 | 61.580                  | 461.291     |
| P1          | 0.063    | 0.035          | 1.065       | 1.828  | 3.340          | 1  | 0.068 | -0.005                  | 0.131       |
| grad1       | -22.416  | 8.805          | 1.840e -10  | -2.546 | 6.481          | 1  | 0.011 | -39.674                 | -5.158      |
| tmin        | -263.163 | 102.407        | 5.126e -115 | -2.570 | 6.604          | 1  | 0.010 | -463.876                | -62.450     |
| Pmin        | -0.058   | 0.035          | 0.944       | -1.647 | 2.711          | 1  | 0.100 | -0.127                  | 0.011       |

Note. Stroke level '1' coded as class 1.

## TIA

### Coefficients

|             | Estimate | Standard Error | Odds Ratio | z      | Wald Test      |    |       | 95% Confidence interval |             |
|-------------|----------|----------------|------------|--------|----------------|----|-------|-------------------------|-------------|
|             |          |                |            |        | Wald Statistic | df | p     | Lower bound             | Upper bound |
| (Intercept) | 115.538  | 116.892        | 1.504e +50 | 0.988  | 0.977          | 1  | 0.323 | -113.566                | 344.641     |
| P1          | -0.274   | 0.222          | 0.760      | -1.234 | 1.522          | 1  | 0.217 | -0.709                  | 0.161       |
| grad1       | -12.804  | 10.034         | 2.749e -6  | -1.276 | 1.628          | 1  | 0.202 | -32.470                 | 6.862       |
| tmin        | -139.139 | 116.494        | 3.739e -61 | -1.194 | 1.427          | 1  | 0.232 | -367.464                | 89.186      |
| Pmin        | 0.299    | 0.223          | 1.348      | 1.340  | 1.795          | 1  | 0.180 | -0.138                  | 0.736       |

*Note.* TIA level '1' coded as class 1.

## Intracranial bleeding

### Coefficients

|             | Estimate | Standard Error | Odds Ratio  | z      | Wald Test      |    |       | 95% Confidence interval |             |
|-------------|----------|----------------|-------------|--------|----------------|----|-------|-------------------------|-------------|
|             |          |                |             |        | Wald Statistic | df | p     | Lower bound             | Upper bound |
| (Intercept) | -273.425 | 266.241        | 1.791e -119 | -1.027 | 1.055          | 1  | 0.304 | -795.247                | 248.397     |
| P1          | -6.729   | 4.423          | 0.001       | -1.521 | 2.314          | 1  | 0.128 | -15.398                 | 1.941       |
| grad1       | -20.845  | 20.769         | 8.852e -10  | -1.004 | 1.007          | 1  | 0.316 | -61.552                 | 19.862      |
| tmin        | -27.963  | 188.997        | 7.173e -13  | -0.148 | 0.022          | 1  | 0.882 | -398.391                | 342.464     |
| Pmin        | 6.757    | 4.428          | 860.324     | 1.526  | 2.329          | 1  | 0.127 | -1.921                  | 15.436      |

*Note.* Intra\_cranial\_haemorrhage level '1' coded as class 1.

## Gastrointestinal bleeding

### Coefficients

|             | Estimate | Standard Error | Odds Ratio | z      | Wald Test      |    |       | 95% Confidence interval |             |
|-------------|----------|----------------|------------|--------|----------------|----|-------|-------------------------|-------------|
|             |          |                |            |        | Wald Statistic | df | p     | Lower bound             | Upper bound |
| (Intercept) | -98.593  | 165.068        | 1.520e -43 | -0.597 | 0.357          | 1  | 0.550 | -422.119                | 224.934     |
| P1          | 0.038    | 0.097          | 1.039      | 0.395  | 0.156          | 1  | 0.693 | -0.152                  | 0.229       |
| grad1       | 7.935    | 14.451         | 2793.016   | 0.549  | 0.301          | 1  | 0.583 | -20.389                 | 36.258      |
| tmin        | 92.134   | 167.051        | 1.031e +40 | 0.552  | 0.304          | 1  | 0.581 | -235.280                | 419.548     |
| Pmin        | -0.048   | 0.100          | 0.953      | -0.481 | 0.231          | 1  | 0.631 | -0.244                  | 0.148       |

Note. GI\_bleeding level '1' coded as class 1.

## In-hospital mortality

### Coefficients

|             | Estimate | Standard Error | Odds Ratio | z      | Wald Test      |    |       | 95% Confidence interval |             |
|-------------|----------|----------------|------------|--------|----------------|----|-------|-------------------------|-------------|
|             |          |                |            |        | Wald Statistic | df | p     | Lower bound             | Upper bound |
| (Intercept) | -81.562  | 76.970         | 3.784e -36 | -1.060 | 1.123          | 1  | 0.289 | -232.421                | 69.297      |
| P1          | 0.074    | 0.035          | 1.077      | 2.102  | 4.420          | 1  | 0.036 | 0.005                   | 0.143       |
| grad1       | 7.057    | 6.658          | 1161.369   | 1.060  | 1.124          | 1  | 0.289 | -5.992                  | 20.107      |
| tmin        | 79.854   | 77.315         | 4.787e +34 | 1.033  | 1.067          | 1  | 0.302 | -71.682                 | 231.389     |
| Pmin        | -0.071   | 0.036          | 0.932      | -1.971 | 3.885          | 1  | 0.049 | -0.141                  | -0.000      |

Note. In\_hospital\_mortality level '1' coded as class 1.

## Multivariate Analysis - RDV

### Drainage blood loss

#### Coefficients

| Model          |             | Unstandardized | Standard Error | Standardized | t      | p      | 95% CI     |           |
|----------------|-------------|----------------|----------------|--------------|--------|--------|------------|-----------|
|                |             |                |                |              |        |        | Lower      | Upper     |
| H <sub>0</sub> | (Intercept) | 782.922        | 37.938         |              | 20.637 | < .001 | 707.971    | 857.873   |
| H <sub>1</sub> | (Intercept) | 21621.267      | 12782.690      |              | 1.691  | 0.093  | -3637.496  | 46880.030 |
|                | P1          | 33.080         | 13.091         | 2.934        | 2.527  | 0.013  | 7.211      | 58.948    |
|                | grad1       | -1230.619      | 1098.546       | -15.990      | -1.120 | 0.264  | -3401.361  | 940.124   |
|                | tmin        | -16198.154     | 12747.047      | -18.112      | -1.271 | 0.206  | -41386.487 | 8990.180  |
|                | Pmin        | -35.146        | 13.580         | -3.114       | -2.588 | 0.011  | -61.980    | -8.313    |

### Bleeding events

#### Coefficients

|             | Estimate | Standard Error | Odds Ratio | z      | Wald Test      |    |       | 95% Confidence interval |             |
|-------------|----------|----------------|------------|--------|----------------|----|-------|-------------------------|-------------|
|             |          |                |            |        | Wald Statistic | df | p     | Lower bound             | Upper bound |
| (Intercept) | 8.407    | 84.434         | 4476.132   | 0.100  | 0.010          | 1  | 0.921 | -157.082                | 173.895     |
| P1          | -0.140   | 0.141          | 0.869      | -0.995 | 0.991          | 1  | 0.320 | -0.417                  | 0.136       |
| grad1       | -1.774   | 7.297          | 0.170      | -0.243 | 0.059          | 1  | 0.808 | -16.075                 | 12.527      |
| tmin        | -15.748  | 84.298         | 1.448e-7   | -0.187 | 0.035          | 1  | 0.852 | -180.968                | 149.472     |
| Pmin        | 0.126    | 0.141          | 1.134      | 0.889  | 0.790          | 1  | 0.374 | -0.151                  | 0.403       |

*Note.* Bleeding level '1' coded as class 1.



## Re-operation for bleeding

### Coefficients

|             | Estimate | Standard Error | Odds Ratio            | z      | Wald Test      |    |       | 95% Confidence interval |             |
|-------------|----------|----------------|-----------------------|--------|----------------|----|-------|-------------------------|-------------|
|             |          |                |                       |        | Wald Statistic | df | p     | Lower bound             | Upper bound |
| (Intercept) | 17.938   | 95.030         | 6.171e <sup>+7</sup>  | 0.189  | 0.036          | 1  | 0.850 | -168.317                | 204.193     |
| P1          | -0.165   | 0.188          | 0.848                 | -0.876 | 0.768          | 1  | 0.381 | -0.533                  | 0.204       |
| grad1       | -2.353   | 8.211          | 0.095                 | -0.287 | 0.082          | 1  | 0.774 | -18.446                 | 13.740      |
| tmin        | -22.293  | 94.565         | 2.080e <sup>-10</sup> | -0.236 | 0.056          | 1  | 0.814 | -207.637                | 163.050     |
| Pmin        | 0.137    | 0.188          | 1.147                 | 0.729  | 0.532          | 1  | 0.466 | -0.232                  | 0.506       |

Note. Reop\_bleeding level '1' coded as class 1.

## Ischaemic stroke

### Coefficients

|             | Estimate | Standard Error | Odds Ratio           | z      | Wald Test            |    |       | 95% Confidence interval |             |
|-------------|----------|----------------|----------------------|--------|----------------------|----|-------|-------------------------|-------------|
|             |          |                |                      |        | Wald Statistic       | df | p     | Lower bound             | Upper bound |
| (Intercept) | 14.775   | 174.295        | 2.609e <sup>+6</sup> | 0.085  | 0.007                | 1  | 0.932 | -326.837                | 356.386     |
| P1          | 0.205    | 0.112          | 1.228                | 1.830  | 3.351                | 1  | 0.067 | -0.015                  | 0.425       |
| grad1       | 1.270    | 14.897         | 3.561                | 0.085  | 0.007                | 1  | 0.932 | -27.928                 | 30.468      |
| tmin        | 4.631    | 173.497        | 102.653              | 0.027  | 7.126e <sup>-4</sup> | 1  | 0.979 | -335.416                | 344.679     |
| Pmin        | -0.230   | 0.119          | 0.795                | -1.922 | 3.695                | 1  | 0.055 | -0.464                  | 0.005       |

Note. Stroke level '1' coded as class 1.

**TIA:** Analysis not performed because of 0 events.

**Intracranial bleeding:** Analysis not performed because of 0 events.

## Gastrointestinal bleeding

### Coefficients

|             | Estimate | Standard Error | Odds Ratio | z     | Wald Test      |    |       | 95% Confidence interval |             |
|-------------|----------|----------------|------------|-------|----------------|----|-------|-------------------------|-------------|
|             |          |                |            |       | Wald Statistic | df | p     | Lower bound             | Upper bound |
| (Intercept) | 3473.747 | 3598.809       | 0.000      | 0.965 | 0.932          | 1  | 0.334 | -10527.283              | 3579.789    |
| P1          | -32.496  | 33.659         | 7.712e -15 | 0.965 | 0.932          | 1  | 0.334 | -98.466                 | 33.474      |
| grad1       | -142.347 | 149.077        | 1.512e -62 | 0.955 | 0.912          | 1  | 0.340 | -434.533                | 149.839     |
| tmin        | -28.367  | 254.124        | 4.788e -13 | 0.112 | 0.012          | 1  | 0.911 | -526.442                | 469.707     |
| Pmin        | 32.501   | 33.658         | 1.303e +14 | 0.966 | 0.932          | 1  | 0.334 | -33.467                 | 98.469      |

Note. GI\_bleeding level '1' coded as class 1.

## In-hospital mortality

### Coefficients

|             | Estimate | Standard Error | Odds Ratio | z     | Wald Test      |    |       | 95% Confidence interval |             |
|-------------|----------|----------------|------------|-------|----------------|----|-------|-------------------------|-------------|
|             |          |                |            |       | Wald Statistic | df | p     | Lower bound             | Upper bound |
| (Intercept) | 82.805   | 109.032        | 9.154e +35 | 0.759 | 0.577          | 1  | 0.448 | -130.894                | 296.503     |
| P1          | -0.069   | 0.140          | 0.934      | 0.489 | 0.239          | 1  | 0.625 | -0.344                  | 0.206       |
| grad1       | -9.005   | 9.216          | 1.227e -4  | 0.977 | 0.955          | 1  | 0.328 | -27.068                 | 9.057       |
| tmin        | -99.637  | 107.241        | 5.348e -44 | 0.929 | 0.863          | 1  | 0.353 | -309.826                | 110.552     |
| Pmin        | 0.064    | 0.145          | 1.066      | 0.444 | 0.197          | 1  | 0.657 | -0.220                  | 0.349       |

Note. In\_hospital\_mortality level '1' coded as class 1.

## Multivariate Analysis - Stentless bioprostheses

### Drainage blood loss

#### Coefficients

| Model          |             | Unstandardized | Standard Error | Standardized | t      | p      | 95% CI     |           |
|----------------|-------------|----------------|----------------|--------------|--------|--------|------------|-----------|
|                |             |                |                |              |        |        | Lower      | Upper     |
| H <sub>0</sub> | (Intercept) | 534.444        | 30.032         |              | 17.796 | < .001 | 474.411    | 594.478   |
| H <sub>1</sub> | (Intercept) | -9226.573      | 11012.053      |              | -0.838 | 0.406  | -31269.591 | 12816.445 |
|                | P1          | -33.928        | 26.302         | -4.492       | -1.290 | 0.202  | -86.578    | 18.721    |
|                | grad1       | 362.050        | 964.296        | 6.477        | 0.375  | 0.709  | -1568.198  | 2292.298  |
|                | tmin        | 5957.200       | 10956.541      | 9.161        | 0.544  | 0.589  | 15974.699  | 27889.099 |
|                | Pmin        | 33.603         | 26.575         | 4.410        | 1.264  | 0.211  | -19.593    | 86.799    |

### Bleeding events

#### Coefficients

|             | Estimate | Standard Error | Odds Ratio             | z      | Wald Test      |    |       | 95% Confidence interval |             |
|-------------|----------|----------------|------------------------|--------|----------------|----|-------|-------------------------|-------------|
|             |          |                |                        |        | Wald Statistic | df | p     | Lower bound             | Upper bound |
| (Intercept) | 135.673  | 219.494        | 8.353e <sup>+58</sup>  | 0.618  | 0.382          | 1  | 0.536 | -294.528                | 565.873     |
| P1          | -0.728   | 0.972          | 0.483                  | -0.749 | 0.560          | 1  | 0.454 | -2.633                  | 1.178       |
| grad1       | -23.713  | 18.473         | 5.031e <sup>-11</sup>  | -1.284 | 1.648          | 1  | 0.199 | -59.919                 | 12.494      |
| tmin        | -234.722 | 200.524        | 1.152e <sup>-102</sup> | -1.171 | 1.370          | 1  | 0.242 | -627.741                | 158.297     |
| Pmin        | 0.692    | 0.974          | 1.998                  | 0.710  | 0.505          | 1  | 0.478 | -1.218                  | 2.602       |

*Note.* Bleeding level '1' coded as class 1.

## Re-operation for bleeding

### Coefficients

|             | Estimate | Standard Error | Odds Ratio | z      | Wald Test      |    |       | 95% Confidence interval |             |
|-------------|----------|----------------|------------|--------|----------------|----|-------|-------------------------|-------------|
|             |          |                |            |        | Wald Statistic | df | p     | Lower bound             | Upper bound |
| (Intercept) | -126.297 | 303.674        | 1.412e-55  | -0.416 | 0.173          | 1  | 0.677 | -721.487                | 468.893     |
| P1          | -1.463   | 1.616          | 0.231      | -0.905 | 0.819          | 1  | 0.365 | -4.632                  | 1.705       |
| grad1       | -14.107  | 22.018         | 7.471e-7   | -0.641 | 0.411          | 1  | 0.522 | -57.261                 | 29.047      |
| tmin        | -79.055  | 233.596        | 4.644e-35  | -0.338 | 0.115          | 1  | 0.735 | -536.895                | 378.785     |
| Pmin        | 1.326    | 1.594          | 3.767      | 0.832  | 0.693          | 1  | 0.405 | -1.797                  | 4.450       |

Note. Reop\_bleeding level '1' coded as class 1.

**Ischaemic stroke:** Analysis not performed because of 0 events.

**TIA:** Analysis not performed because of 0 events.

**Intracranial bleeding:** Analysis not performed because of 0 events.

**Gastrointestinal bleeding:** Analysis not performed because of 0 events.

## In-hospital mortality

### Coefficients

|             | Estimate | Standard Error | Odds Ratio | z        | Wald Test      |    |       | 95% Confidence interval |              |
|-------------|----------|----------------|------------|----------|----------------|----|-------|-------------------------|--------------|
|             |          |                |            |          | Wald Statistic | df | p     | Lower bound             | Upper bound  |
| (Intercept) | 3303.044 | 15657664.603   | 0.000      | 2.110e-4 | 4.450e-8       | 1  | 1.000 | 30691761.748            | 30685155.659 |
| P1          | -6.284   | 77278.987      | 0.002      | 8.131e-5 | 6.612e-9       | 1  | 1.000 | -151470.315             | 151457.747   |
| grad1       | 232.277  | 1076037.827    | 7.524e+100 | 2.159e-4 | 4.660e-8       | 1  | 1.000 | -2108763.109            | 2109227.663  |
| tmin        | 2945.445 | 12443006.890   | $\infty$   | 2.367e-4 | 5.603e-8       | 1  | 1.000 | 24384899.918            | 24390790.809 |
| Pmin        | 5.446    | 78548.658      | 231.750    | 6.933e-5 | 4.806e-9       | 1  | 1.000 | -153947.095             | 153957.986   |

Note. In\_hospital\_mortality level '1' coded as class 1.
